# Supplementary material for: HIV-1 Proviral Genome Engineering with CRISPR-Cas9 for Mechanistic Studies
Source: MDPI journal article supplement (doi:10.3390/v16020287), 2024-02-13
Supplement: s1 [file s1]

## **Supplementary Information**

### **HIV-1 proviral genome engineering with CRISPR-Cas9 for mechanistic studies**

Usman Hyder<sup>†</sup>, Ashutosh Shukla<sup>†‡</sup>, Ashwini Challa and Iván D'Orso<sup>\*</sup>

Department of Microbiology, The University of Texas Southwestern Medical Center, Dallas, TX 75390, USA;

<sup>†</sup>These authors contributed equally

<sup>‡</sup> Current address: Division of Digestive and Liver Diseases, The University of Texas Southwestern Medical Center, Dallas, TX 75390, USA;

<sup>\*</sup>For correspondence: [ivan.dorso@utsouthwestern.edu](mailto:ivan.dorso@utsouthwestern.edu)

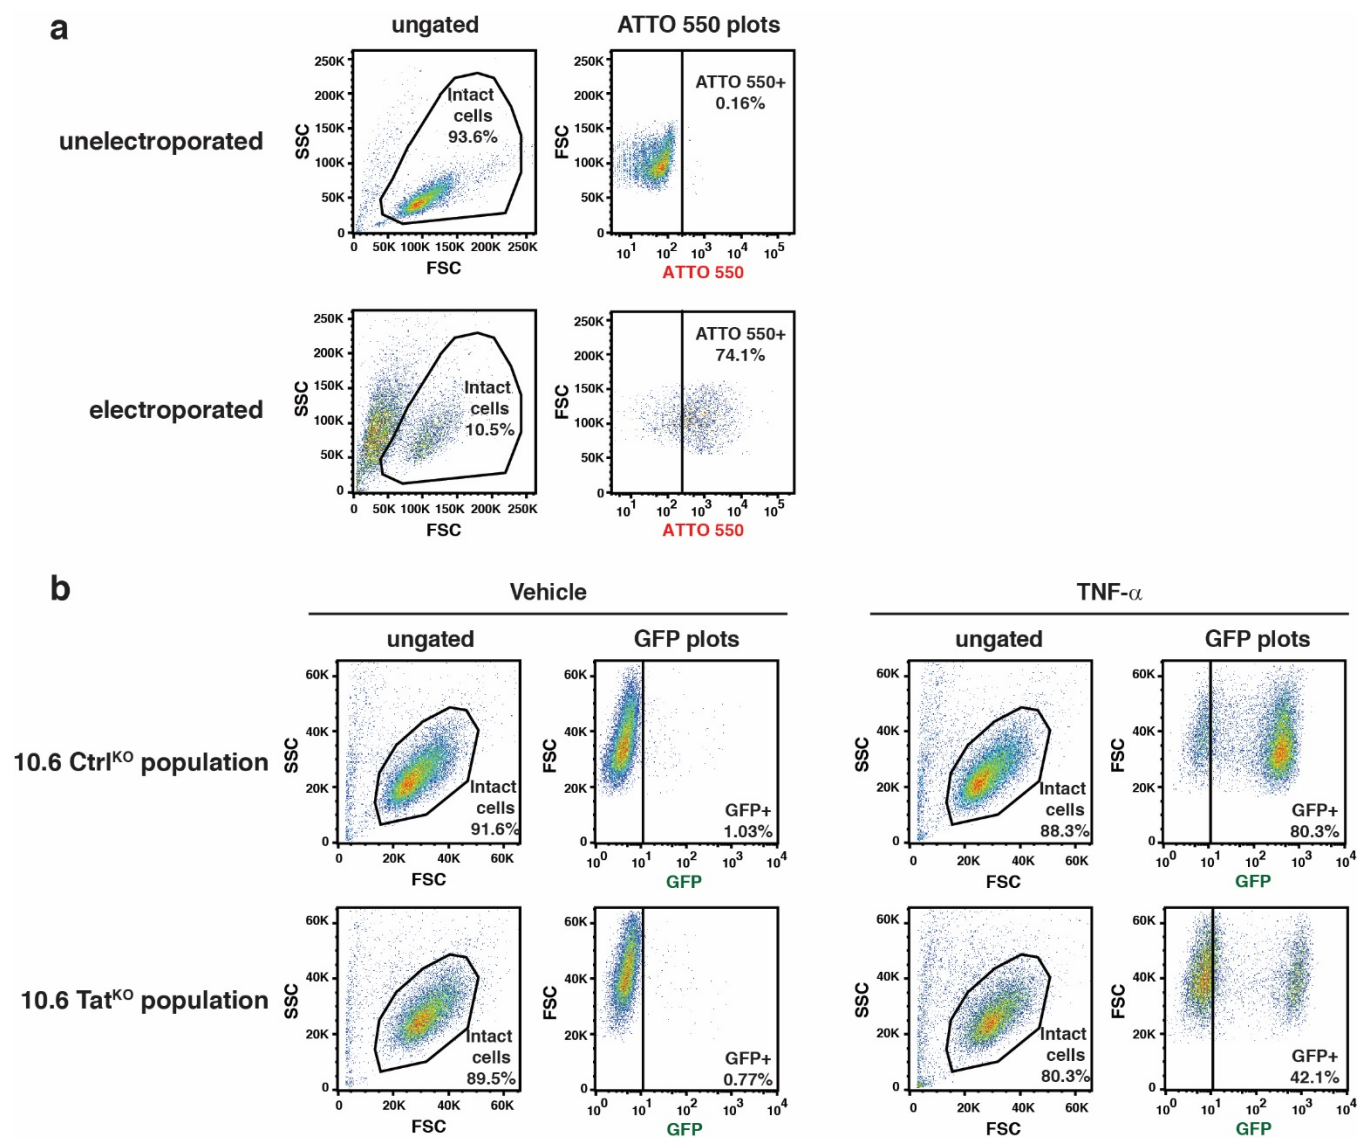

**Supplementary Figure S1. J-Lat 10.6 Tat<sup>KO</sup> cells can be made using a CRISPR-Cas9-based approach.**  
 (a) Raw flow cytometry plots (ungated cells and ATTO 550+ cells) for data in Figure 3a. (b) Raw flow cytometry plots (ungated cells and GFP+ cells) for data in Figure 3b.

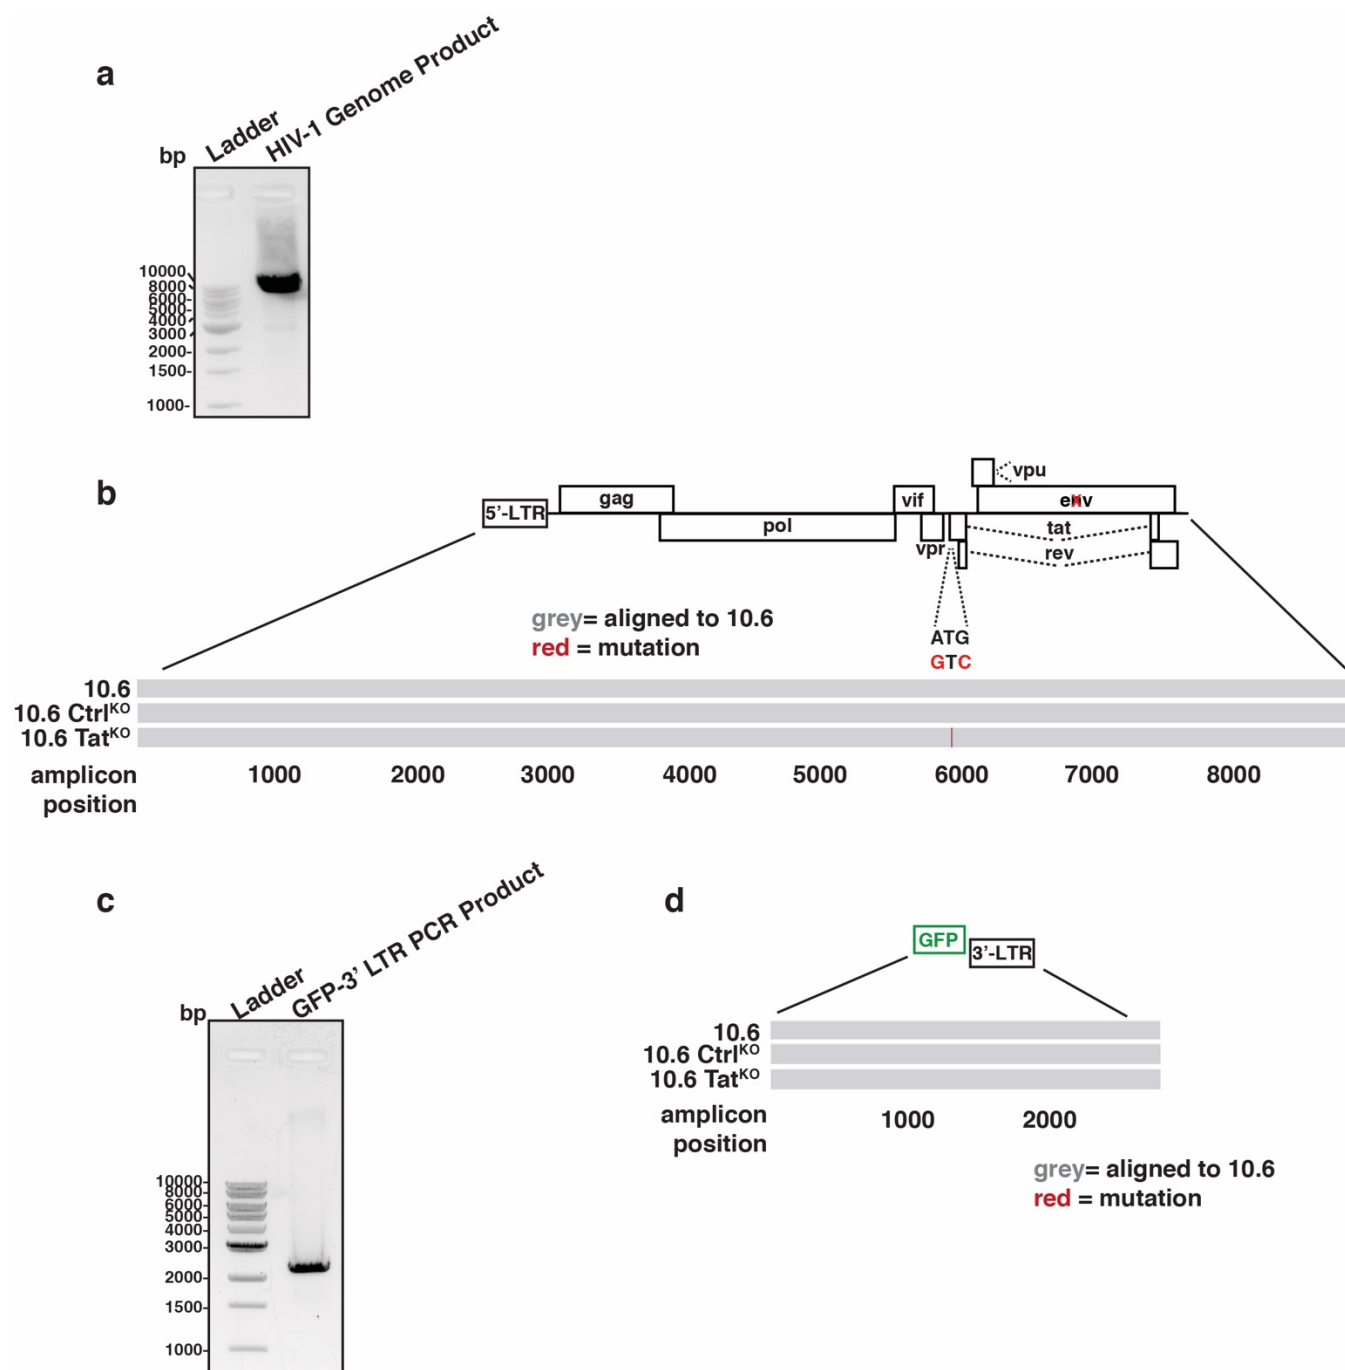

**Supplementary Figure S2. HIV-1 genome sequencing in 10.6 Ctrl<sup>KO</sup> and 10.6 Tat<sup>KO</sup> clones.** (a) Agarose gel showing the HIV-1 genome PCR product. Parental 10.6 cells are shown as an example. (b) Amplicon sequencing of the HIV-1 genome PCR products showing alignment between DNA obtained from 10.6, 10.6 Ctrl<sup>KO</sup>, and 10.6 Tat<sup>KO</sup> cells. (c) Agarose gel showing the GFP-3' LTR PCR product. 10.6 parental cells are shown as an example. (d) Amplicon sequencing of the GFP-3' LTR PCR products showing alignment between DNA obtained from 10.6, 10.6 Ctrl<sup>KO</sup>, and 10.6 Tat<sup>KO</sup> clones.

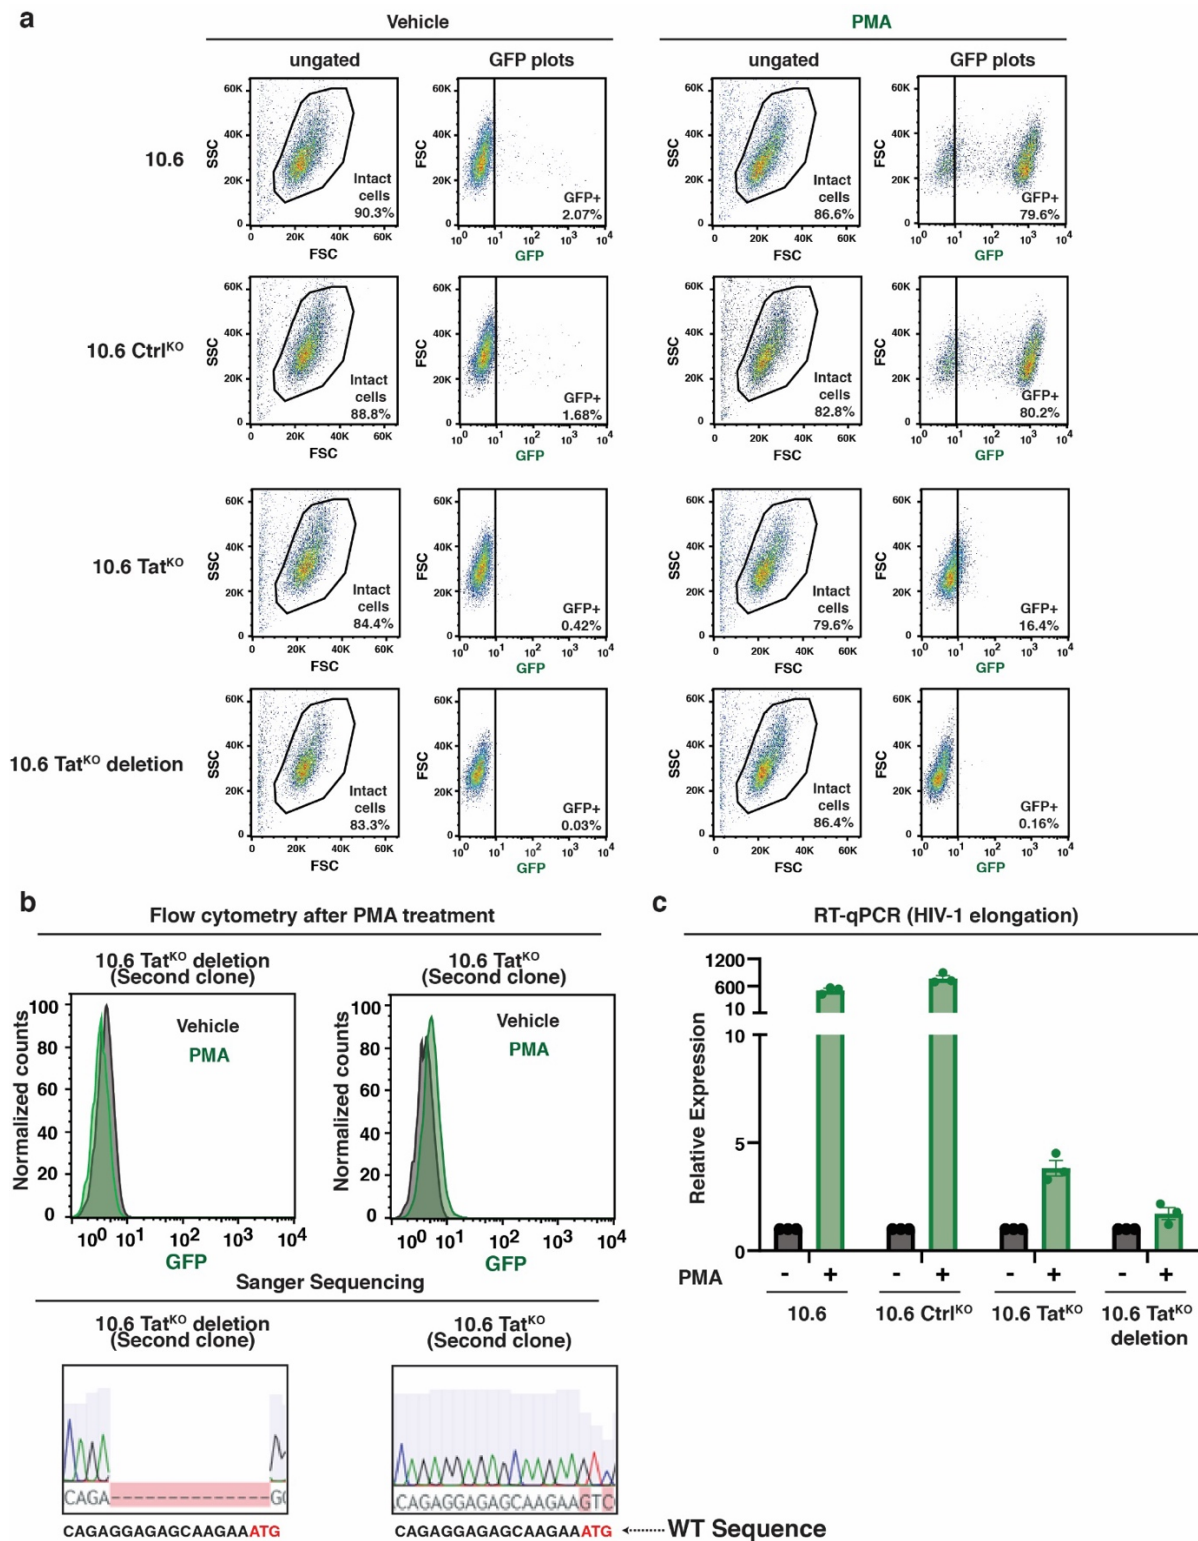

**Supplementary Figure S3. Precise provirus genomic mutations and large deletions lead to differences in HIV-1 transcription induction upon cell stimulation.** (a) Raw flow cytometry plots (ungated cells and GFP+ cells) for data in Figures 4a-b. (b) Flow cytometry histograms of the indicated clones treated with vehicle DMSO or PMA. The Sanger sequencing data for each clone is indicated below. (c) RT-qPCR data for HIV-1 elongation in 4 cell lines (10.6, 10.6 Ctrl<sup>KO</sup>, 10.6 Tat<sup>KO</sup>, and 10.6 Tat<sup>KO</sup> deletion) -/+ 16 h PMA. n=3, +/- SEM.

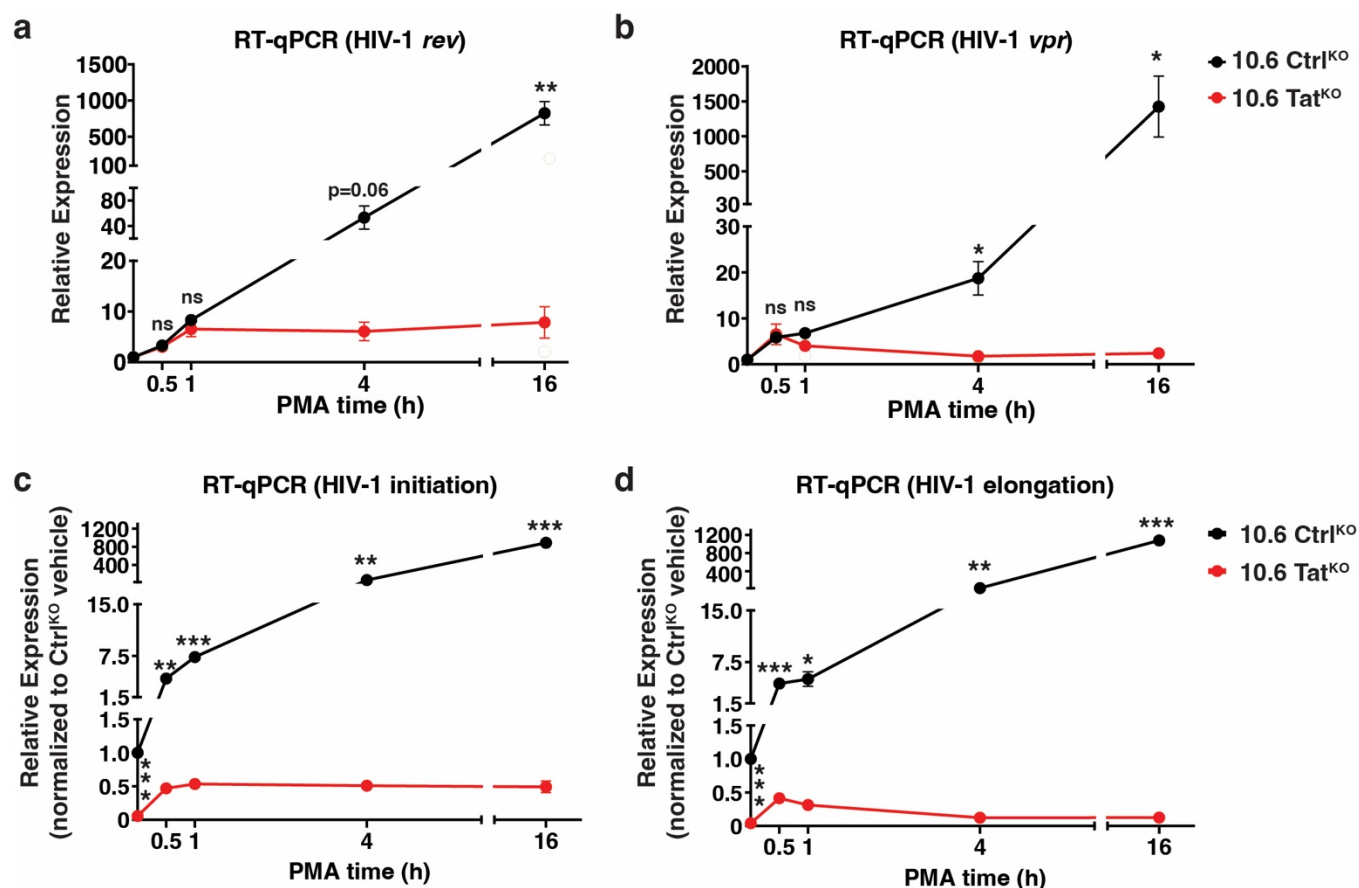

**Supplementary Figure S4. Tat sustains enhanced HIV-1 expression upon cell stimulation.** (a-b) RT-qPCR for HIV-1 *rev* (a) and *vpr* (b) in 10.6 Ctrl<sup>KO</sup> and 10.6 Tat<sup>KO</sup> cell lines across the PMA time course. All data presented in these plots are normalized to the respective vehicle control for that cell line. Statistics are compared between 10.6 Ctrl<sup>KO</sup> and 10.6 Tat<sup>KO</sup> for each time point using an unpaired Student's t-test, n=3, +/- SEM, ns = non-significant, \*  $p < 0.05$ , \*\*  $p < 0.01$ . (c-d) RT-qPCR for HIV-1 initiation (c) and HIV-1 elongation (d) in 10.6 Ctrl<sup>KO</sup> and 10.6 Tat<sup>KO</sup> cell lines across the PMA time course. All data presented in these plots are normalized to the 0 time point of the 10.6 Ctrl<sup>KO</sup> cell line. Statistics are compared between 10.6 Ctrl<sup>KO</sup> and 10.6 Tat<sup>KO</sup> for each time point using a unpaired Student's t-test, n=3, +/- SEM, \*  $p < 0.05$ , \*\*  $p < 0.01$ , \*\*\*  $p < 0.001$ .

**Supplementary Table S1. Oligos used in this paper.**

| Number | Name                            | Sequence (5'-3')                                                                                              | Usage                                              | Modifications                                                                  |
|--------|---------------------------------|---------------------------------------------------------------------------------------------------------------|----------------------------------------------------|--------------------------------------------------------------------------------|
|        | Tat ATG (10.6) crRNA oligo      | CGACAGAGGAGAGCAAGAAA                                                                                          | Annealed to tracrRNA, ATTO™ 550 to create the gRNA | N-terminal AltR1<br>C-terminal AltR2                                           |
|        | HIV-1 10.6 Positive Donor oligo | G*A*CATAGCAGAATAG<br>GCGTTACTCGACAGAG<br>GAGAGCAAGAAGTCG<br>AGCCAGTAGATCCTAG<br>ACTAGAGCCCTGGAAG<br>CATCC*A*G | HDR donor oligo                                    | N-terminal Alt-R-HDR1<br>C-terminal Alt-R-HDR2<br>4 Phosphorothioate bonds (*) |
|        | HIV-1 10.6 Negative Donor oligo | C*T*GGATGCTTCCAGG<br>GCTCTAGTCTAGGATCT<br>ACTGGCTCGACTTCTTG<br>CTCTCCTCTGTCGAGTA<br>ACGCCTATTCTGCTATG<br>*T*C | HDR donor oligo                                    | N-terminal Alt-R-HDR1<br>C-terminal Alt-R-HDR2<br>4 Phosphorothioate bonds (*) |
| 3078   | HIV-1_Tat_For                   | AGCCACACAATGAATG<br>GACA                                                                                      | PCR                                                |                                                                                |
| 3079   | HIV-1_Tat_Rev                   | CAAACCTGGCAATGAA<br>AGCA                                                                                      | PCR; Sanger sequencing                             |                                                                                |
| 3931   | 10.6_up 5' LTR_F                | CGTACTGGCTGGAGTA<br>ATAGCT                                                                                    | PCR of HIV-1 genome                                |                                                                                |
| 3932   | eGFP-N                          | CGTCGCCGTCCAGCTC<br>GACCAG                                                                                    | PCR of HIV-1 genome                                |                                                                                |
| 3933   | Frag-26-R-RC                    | CTGGCTGTGGAAAGAT<br>ACCT                                                                                      | PCR of GFP and 3' LTR                              |                                                                                |
| 3934   | 10.6_down 3' LTR_R              | GAATGCCCATTGCTTTG<br>GGAA                                                                                     | PCR of GFP and 3' LTR                              |                                                                                |
| 3076   | HIV-1_elongation_FWD            | GACGGTACAGGCCAGA<br>CAAT                                                                                      | RT-qPCR<br>ChIP-qPCR                               |                                                                                |
| 3077   | HIV-1_elongation_REV            | GATGCCCCAGACTGTG<br>AGTT                                                                                      | RT-qPCR<br>ChIP-qPCR                               |                                                                                |
| 1111   | HIV-1_initiation_FWD            | GCTTAAGCCTCAATAA<br>AGCTTGCCCTGAG                                                                             | RT-qPCR                                            |                                                                                |
| 1112   | HIV-1_initiation_REV            | GTCCTGCGTCGAGAGA<br>GCTCCTCTG                                                                                 | RT-qPCR                                            |                                                                                |
| 3991   | HIV-1_rev_FWD                   | TTCAGCTACCACCGCTT<br>GAG                                                                                      | RT-qPCR                                            |                                                                                |
| 3992   | HIV-1_rev_REV                   | TATTTGAGGGCTTCCCA<br>CCC                                                                                      | RT-qPCR                                            |                                                                                |
| 3372   | HIV-1_vpr_FWD                   | AGCCCCAGAAGACCA<br>AGG                                                                                        | RT-qPCR                                            |                                                                                |
| 3373   | HIV-1_vpr_REV                   | TTGCCCTAAGCCATGG<br>AG                                                                                        | RT-qPCR                                            |                                                                                |
| 1868   | GAPDH_FWD                       | GCAAATTCATGGCAC<br>CGT                                                                                        | RT-qPCR                                            |                                                                                |

|      |                  |                             |         |  |
|------|------------------|-----------------------------|---------|--|
| 1869 | <i>GAPDH_REV</i> | TCGCCCCACTTGATTTT<br>GG     | RT-qPCR |  |
| 9    | <i>U6_FWD</i>    | CTCGCTTCGGCAGCAC<br>ATATAC  | RT-qPCR |  |
| 10   | <i>U6_REV</i>    | GGAACGCTTCACGAAT<br>TTGCGTG | RT-qPCR |  |

**Supplementary Table S2. Antibodies used in this paper.**

| <b>Target</b>              | <b>Company</b>             | <b>Catalog Number</b>           | <b>Assay (Dilution/time)</b> |
|----------------------------|----------------------------|---------------------------------|------------------------------|
| Tat                        | Abcam                      | ab43014                         | Western blot (1:500/ON)      |
| Gag/p24                    | NIH HIV reagents Program   | 4121 (Mab to HIV-1 p24 (AG3.0)) | Western blot (1:500/ON)      |
| Actin Rhodamine            | Bio-Rad                    | 12004163                        | Western blot (1:10000/1 h)   |
| Goat anti-mouse IgG-HRP    | Santa Cruz Biotechnologies | sc-2005                         | Western blot (1:10000/1 h)   |
| Donkey anti-rabbit IgG-HRP | Santa Cruz Biotechnologies | sc-2313                         | Western blot (1:10000/1 h)   |
| RPB3 (Pol II)              | Millipore                  | ABE999                          | ChIP-qPCR (5 µg/ON)          |
